# Supplementary material for: Phosphorus-doped graphene nanosheets anchored with cerium oxide nanocrystals as effective sulfur hosts for high performance lithium–sulfur batteries
Source: Royal Society of Chemistry journal article supplement (doi:10.1039/c9nr03278a), 2019-01-01
Supplement: c9nr03278a1.pdf [file c9nr03278a1.pdf]

Supporting Information

# Phosphorous-doped graphene nanosheets anchored with cerium oxide nanocrystals as effective sulfur hosts for high performance lithium–sulfur batteries

Myungjin Kim<sup>‡a</sup>, Jeongyeon Lee<sup>‡c</sup>, Youngmoo Jeon<sup>a</sup>, and Yuanzhe Piao<sup>\*a,b</sup>

<sup>a</sup> Program in Nano Science and Technology, Graduate School of Convergence Science and Technology, Seoul National University, 145 Gwanggyo-ro, Yeongtong-gu, Suwon–si, Gyeonggi-do, 443-270, Republic of Korea

<sup>b</sup> Advanced Institutes of Convergence Technology, 145 Gwanggyo-ro, Yeongtong-gu, Suwon–si, Gyeonggi-do, 443-270, Republic of Korea

<sup>c</sup> Department of Applied Biology and Chemical Technology and the State Key Laboratory of Chemical Biology and Drug Discovery, The Hong Kong Polytechnic University, Hung Hom, Kowloon, Hong Kong

‡ These authors contributed equally to this work.

Address correspondence to [parkat9@snu.ac.kr](mailto:parkat9@snu.ac.kr) (Y. Piao)

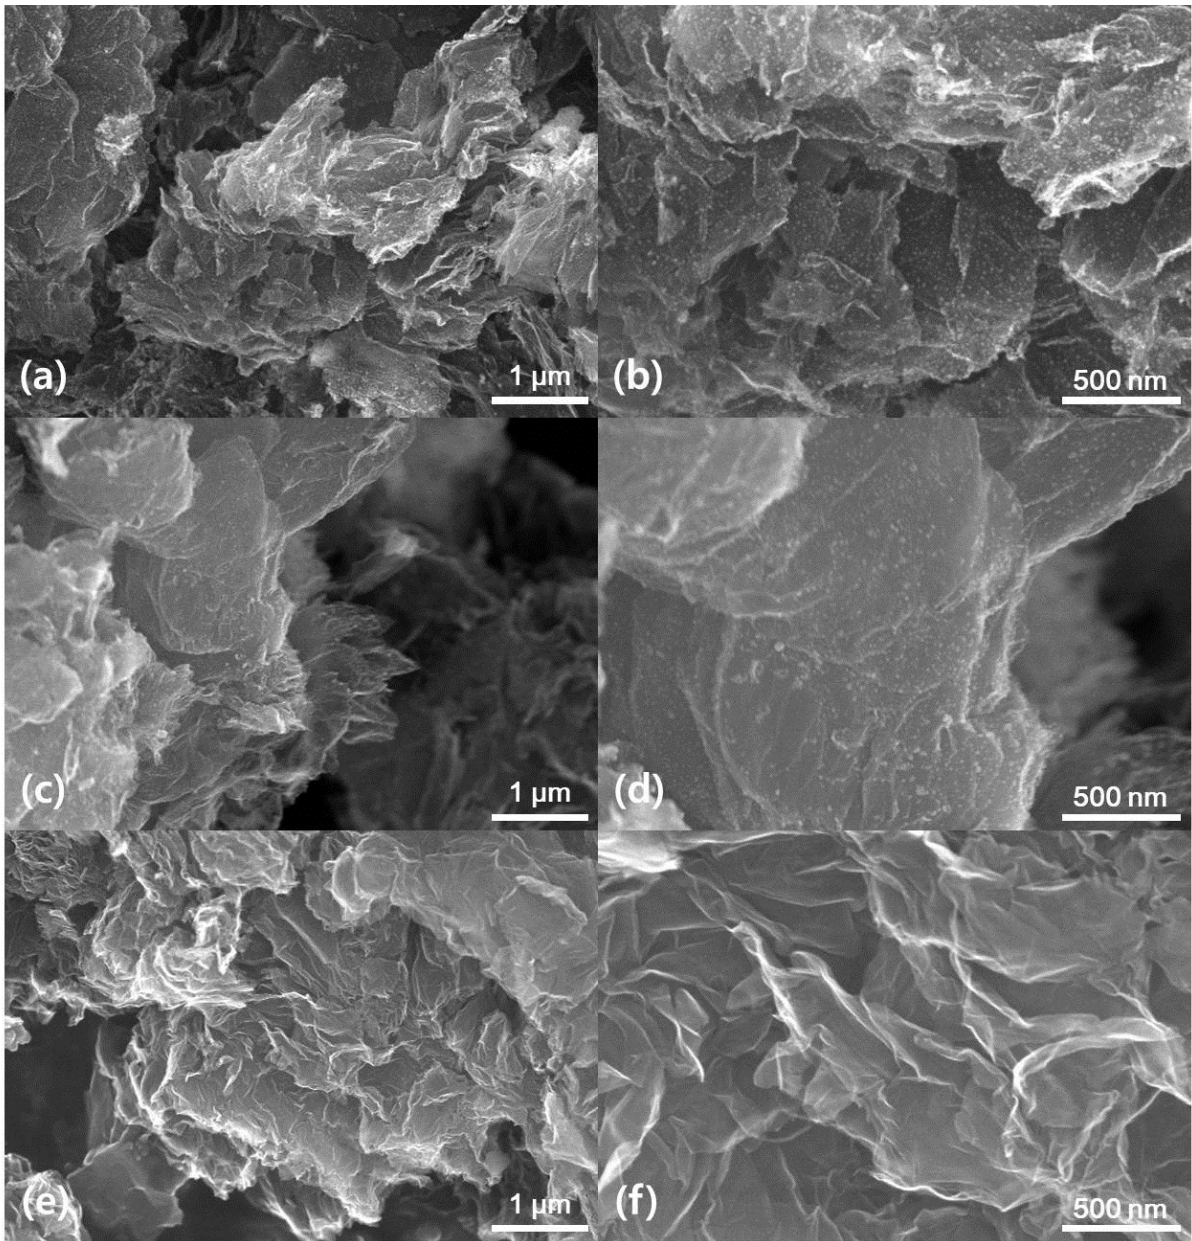

**Fig. S1** Low and relatively high magnification SEM images of a,b) CeO<sub>2</sub>/PG, c,d) CeO<sub>2</sub>/G, and e,f) G.

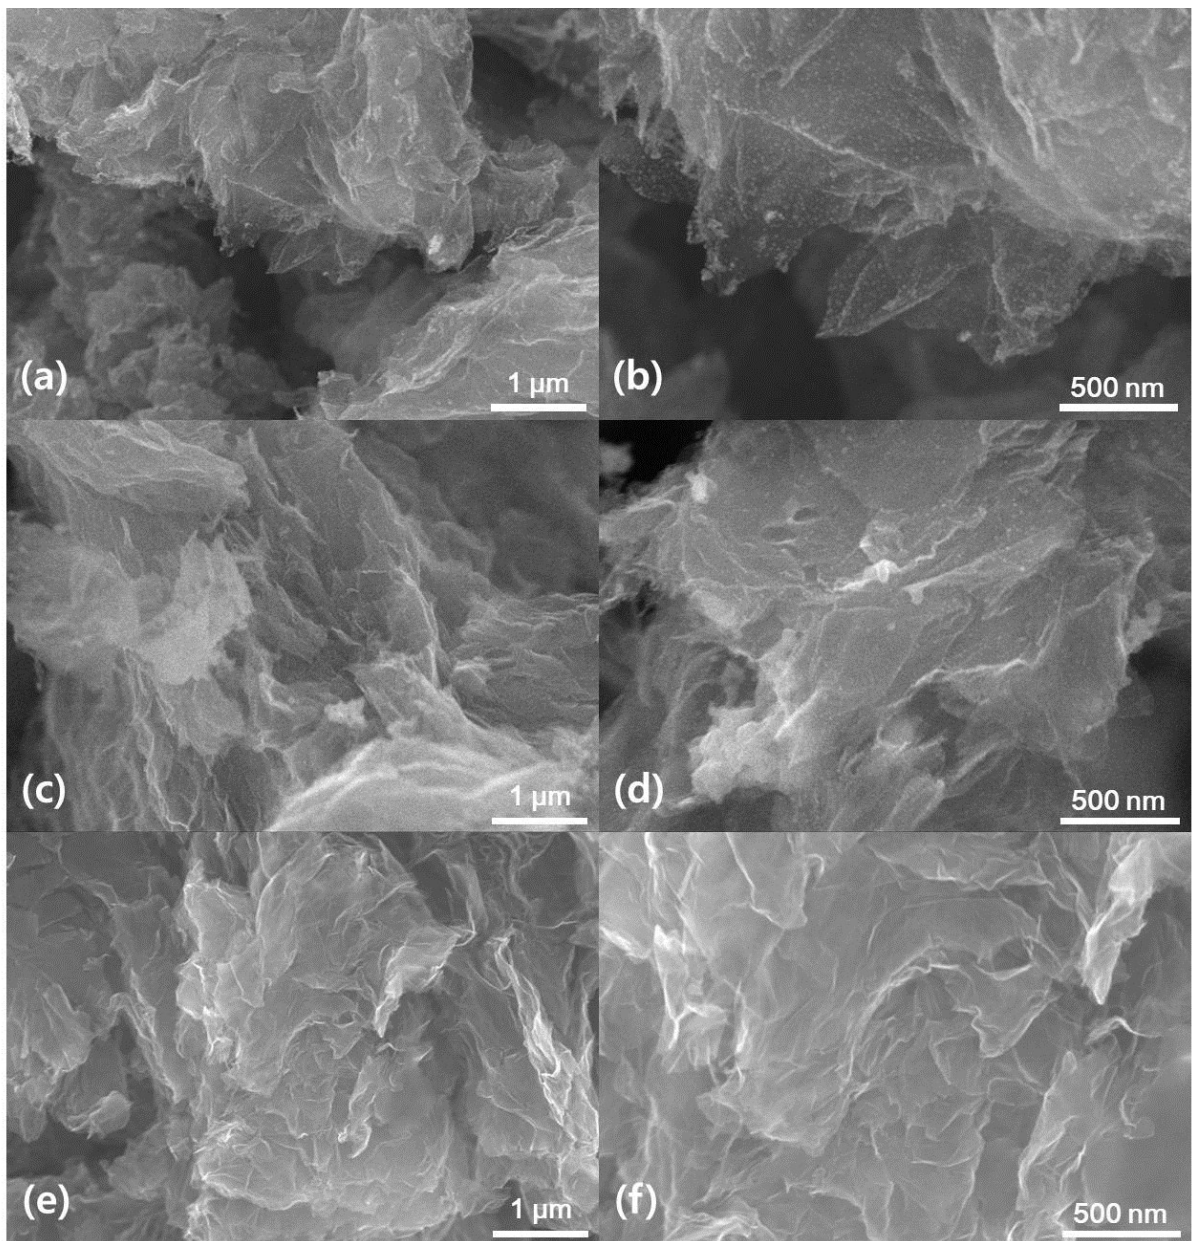

**Fig. S2** Low and relatively high magnification SEM images of a,b) S@CeO<sub>2</sub>/PG, c,d) S@CeO<sub>2</sub>/G, and e,f) S@G.

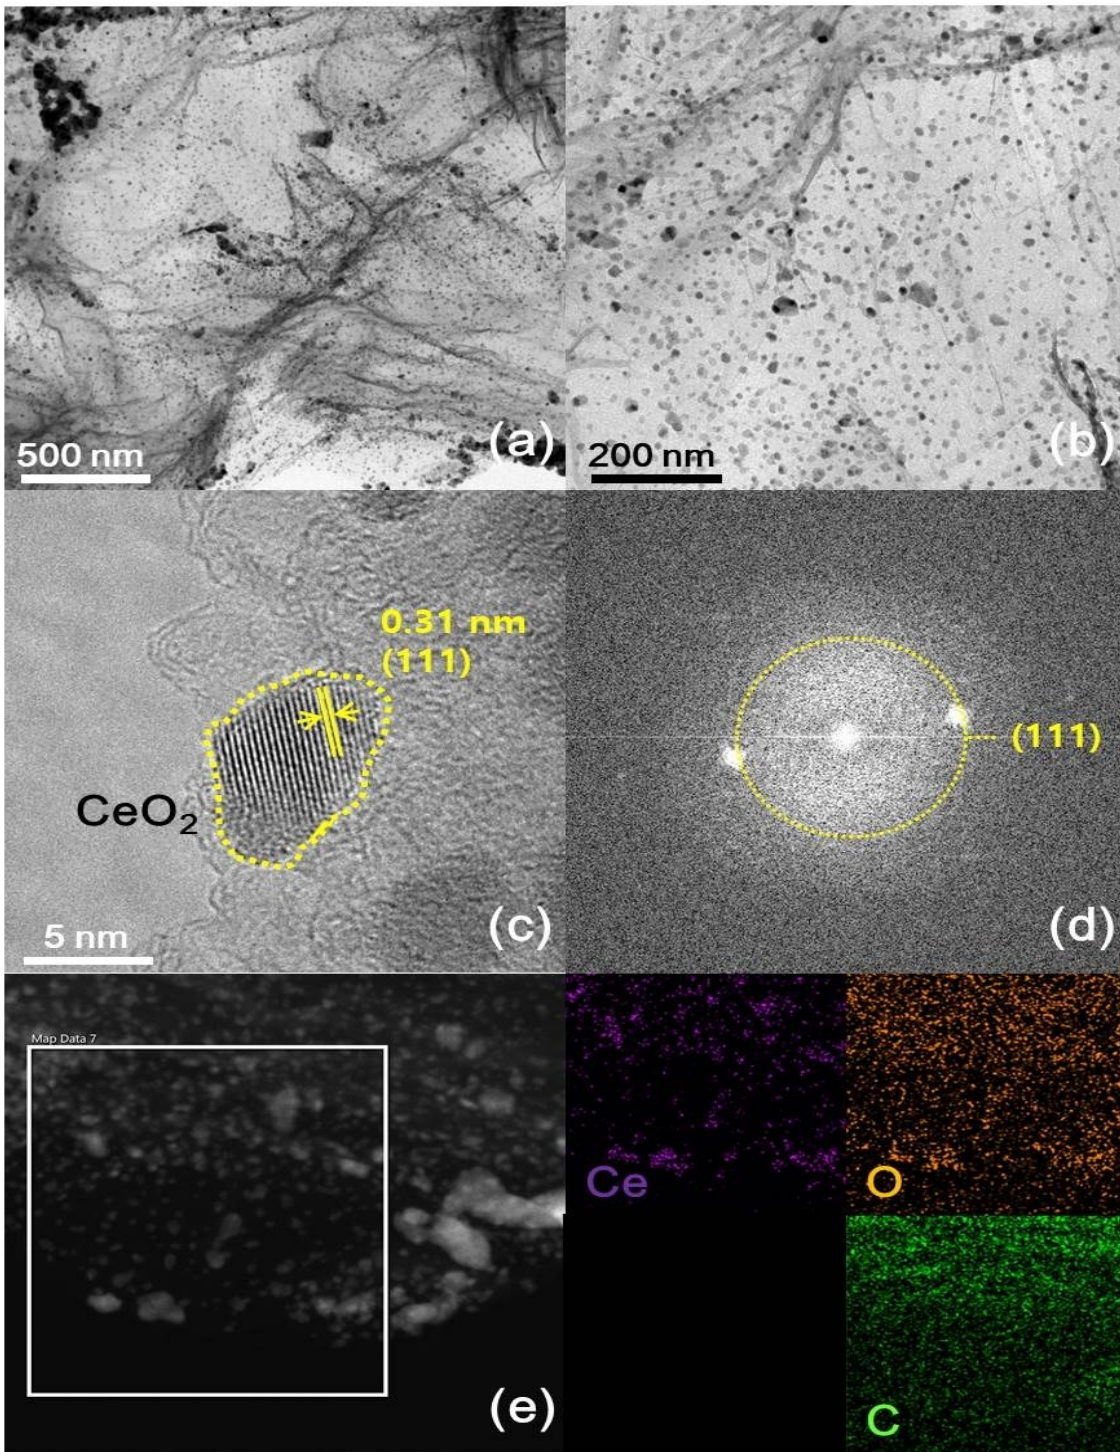

**Fig. S3** a,b) TEM images, c) high-resolution TEM (HRTEM) image of CeO<sub>2</sub> nanoparticles anchored on graphene. d) Fast Fourier Transform (FFT) pattern of CeO<sub>2</sub>/G composites, e) EDX maps of Ce, O, and C.

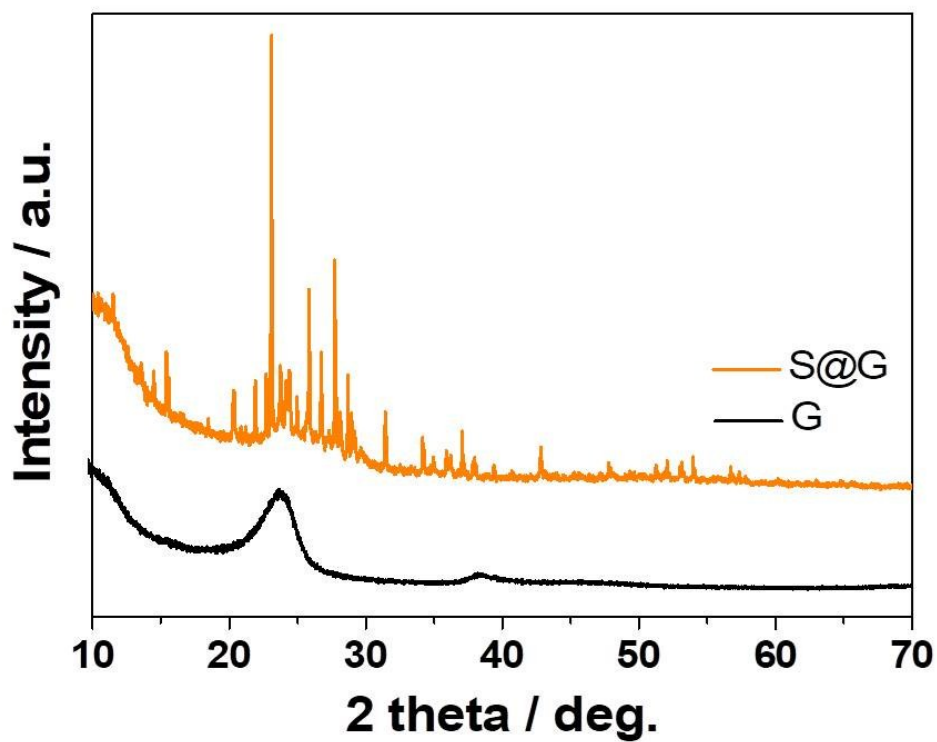

**Fig. S4** X-ray diffraction patterns of S@G and G.

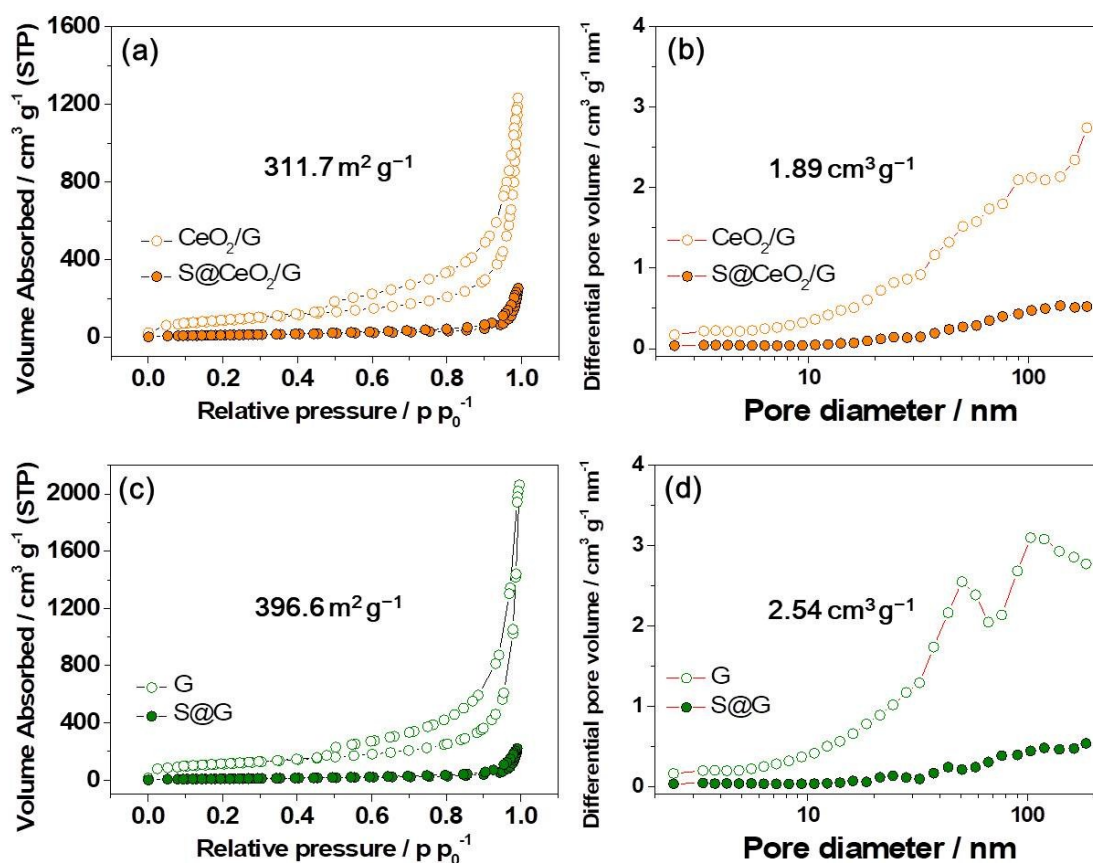

**Fig. S5** N<sub>2</sub> adsorption-desorption isotherms and pore distribution of a,b) S@CeO<sub>2</sub>/G and CeO<sub>2</sub>/G, c,d) S@G and G, respectively.

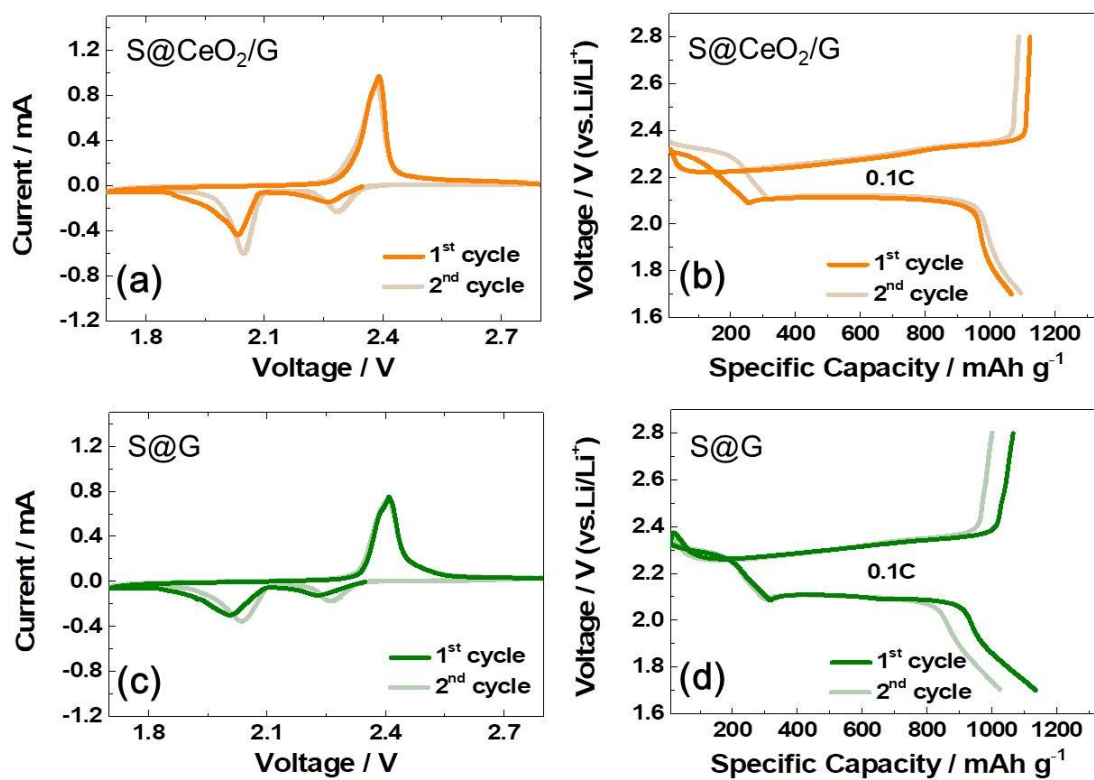

**Fig. S6** Cyclic voltammograms and charge/discharge profiles of a,b) S@CeO<sub>2</sub>/G and c,d) S@G electrodes, respectively.

**Table S1** The contents of CeO<sub>2</sub>/PG composites from XPS analysis.

| Sample               | Content | At [%] | Mass [%] |
|----------------------|---------|--------|----------|
| CeO <sub>2</sub> /PG | P 2p    | 1.27   | 2.8      |
|                      | C 1s    | 84.3   | 71.85    |
|                      | O 1s    | 13.41  | 15.23    |
|                      | Ce 3d   | 1.02   | 10.11    |
